# Supplementary material for: All-fiber acousto-electric energy harvester from magnesium salt-modulated PVDF nanofiber
Source: Royal Society of Chemistry journal article supplement (doi:10.1039/d0se01185a), 2020-12-28
Supplement: d0se01185a1.pdf [file d0se01185a1.pdf]

## Electronic Supplementary Information

### All-Fiber Acousto- electric Energy Harvester from Magnesium Salt Modulated PVDF

#### Nanofiber

Biswajit Mahanty<sup>a,b,\$</sup>, Sujoy Kumar Ghosh<sup>a,†,\$</sup>, Santanu Jana<sup>c</sup>, Kritish Roy<sup>a</sup>, Subrata Sarkar<sup>a</sup> and  
Dipankar Mandal<sup>\*d</sup>

<sup>a</sup>Department of Physics, Jadavpur University, Kolkata 700032, India

<sup>b</sup>Department of Electronics & Communication Engineering, Saroj Mohan Institute of  
Technology, Guptipara, Hooghly 712512, India

<sup>c</sup>Department of Electronics, Netaji Nagar Day College, Kolkata 700092, India

<sup>d</sup>Institute of Nano Science and Technology, Knowledge City, Sector 81, Mohali 140306, India

Corresponding author: [dmandal@inst.ac.in](mailto:dmandal@inst.ac.in), [dpkrmandal@gmail.com](mailto:dpkrmandal@gmail.com)

<sup>\$</sup> These authors contributed equally to this work.

**Table S1** Mechano-sensitivity of reported piezoelectric based pressure sensors.

| Material                                                                            | Sensitivity (V/kPa)  | Reference |
|-------------------------------------------------------------------------------------|----------------------|-----------|
| Piezoelectric fiber array vertically integrated P(VDF-TrFE)                         | 0.027                | 1         |
| P(VDF-TrFE)/CMOS transistor                                                         | 0.011                | 2         |
| P(VDF-TrFE) film                                                                    | $2.2 \times 10^{-5}$ | 3         |
| Carbonized electrospun polyacrylonitrile/barium titanate (PAN-C/BTO) nanofiber film | 0.324                | 4         |
| Aligned P(VDF-TrFE)/MWCNT composites                                                | 0.121                | 5         |
| Cellular fluorocarbon                                                               | 1.54                 | 6         |
| P(VDF-TrFE) thin film                                                               | $7.5 \times 10^{-4}$ | 7         |
| Electrospun PVDF fabric                                                             | $8.2 \times 10^{-4}$ | 8         |
| P(VDF-TrFE) nanotube                                                                | 0.05                 | 9         |
| Electrospun PVDF/BaTiO <sub>3</sub> nanowire (NW) nanocomposite fibers              | 0.017                | 10        |
| Laterally aligned PZT angle-crystal nanowires                                       | 0.14                 | 11        |
| PVDF-MWCNT-OMMT                                                                     | 0.0176               | 12        |
| PVDF-ZnO nanofibers                                                                 | 0.00312              | 13        |
| PVDF-Mg nanofibers                                                                  | 0.44                 | This work |

**Table S2** A summary or comparison of device materials, electrode materials, and capacitor charging performances of the AAPNG with the reported nanogenerators.

| Active material                         | Electrode                     | Charging time(s), Capacitor value ( $\mu\text{F}$ ) | Saturation voltage (V), Power stored ( $\mu\text{W}$ ) | References |
|-----------------------------------------|-------------------------------|-----------------------------------------------------|--------------------------------------------------------|------------|
| P(VDF-TrFE)/BaTiO <sub>3</sub>          | conductive fabric             | 250, 0.068                                          | 35, 0.17                                               | 14         |
| aligned PVDF                            | (PANI-PVDF)                   | 60, 1.0                                             | 4, 1.3                                                 | 15         |
| NFs                                     | NFs mats                      |                                                     |                                                        |            |
| P(VDF-TrFE)                             | Al foils                      | 1800, 47                                            | 16, 3.34                                               | 16         |
| Pt-PVDF                                 | Cu–Ni polyester fabric        | 80, 1                                               | 3, 0.06                                                | 17         |
| PZT-NH <sub>2</sub> NPs                 | Al-coated (PI)/PET)           | 100, 2.2                                            | 4, 0.18                                                | 18         |
| Hybridization encapsulated PVDF         | sugar- Conducting textile     | 100, 1                                              | 8, 0.32                                                | 19         |
| PVDF/ BaTiO <sub>3</sub>                | Al foils                      | 76, 1                                               | 1.40, 0.01                                             | 20         |
| (P(VDF-TrFE))/ BaTiO <sub>3</sub>       | ITO-coated PET                | 120, 4.7                                            | 1.5, 0.04                                              | 21         |
| Poly(vinyl alcohol) (PVA)/ ZnS nanorods | Ni–Cu polyester fabric,       | 40, 1                                               | 0.72, 0.007                                            | 22         |
| PVDF/ ZnS nanorods                      | Ni–Cu polyester fabric        | 130, 2.2                                            | 10, 0.85                                               | 23         |
| PVDF-niobate-based                      | AgNW                          | 300, 2.2                                            | 5, 0.09                                                | 24         |
| [P(VDF-TrFE)]                           | 3D PMMA/Au                    | 5, 0.1                                              | 3.2, 0.01                                              | 25         |
| Ce <sup>3+</sup> / PVDF/Graphene        | Ni-Cu plated polyester fabric | 60, 4.7                                             | 0.75, 0.02                                             | 26         |
| PVDF-Mg                                 | Ni–Cu polyester fabric        | 65, 2.2                                             | 2.6, 0.12                                              | This work  |

**Table S3** Comparison of the piezoelectric coefficient of PVDF-Mg with the reported PVDF based nanofibers materials.

| Active material                                       | Piezoelectric Coefficient ( $d_{33}$ ) | Reference |
|-------------------------------------------------------|----------------------------------------|-----------|
| PVDF/CH <sub>3</sub> NH <sub>3</sub> PbI <sub>3</sub> | 19.7 pC/N                              | 27        |
| Pt/PVDF                                               | 44 pC/N                                | 28        |
| PVDF                                                  | -57:6 pm/V                             | 29        |
| PVDF                                                  | 37 pm/V                                | 30        |
| PVDF/GO                                               | ~ -30 pC/N                             | 31        |
| PVDF                                                  | 17.1 pm /V                             | 32        |
| Sugar/PVDF                                            | 33 pC/N                                | 33        |
| PVDF                                                  | -33 pC/N                               | 34        |
| PVDF/<br>Ag-CNTs                                      | 54 ± 5 pm/ V                           | 35        |
| BTO/P(VDF-TrFE)                                       | 35.3 pC/N                              | 36        |
| PVDF/GO                                               | -93.75 pm/V                            | 37        |
| GO doped<br>Fluorine/PVDF                             | 63 pm/V                                | 38        |
| PVDF-Mg                                               | 33.6 pC/N                              | This work |

**Table S4** A summary or comparison of device materials, electrode materials and percentage of piezoelectric energy conversion efficiency ( $\% \eta_{acoust}$ ) of the AAPNG with the reported nanogenerators.

| Active material                                       | Electrode                     | Efficiency (%) | Acoustic sensitivity     | References |
|-------------------------------------------------------|-------------------------------|----------------|--------------------------|------------|
| PVDF nanofiber                                        | gold                          | NM             | 266 mV Pa <sup>-1</sup>  | 39         |
| PVDF-TiO <sub>2</sub> nanofiber                       | conducting fabrics            | 61             | 26 VPa <sup>-1</sup>     | 40         |
| PVDF-ZnS nanofiber                                    | Cu-Ni coated polyester        | 58             | 3 VPa <sup>-1</sup>      | 41         |
| PZT based MEMS                                        | NM                            | 0.012          | 0.13 mV Pa <sup>-1</sup> | 42         |
| Ce <sup>3+</sup> PVDF/                                | Ni-Cu plated                  | NM             | 15 V Pa <sup>-1</sup>    | 43         |
| Graphene nanofiber                                    | polyester fabric              |                |                          |            |
| P(VDF-TrFE) nanofiber                                 | gold                          | 60.3           | 1.3 VPa <sup>-1</sup>    | 44         |
| PVDF/CH <sub>3</sub> NH <sub>3</sub> PbI <sub>3</sub> | Ni-Cu plated polyester fabric | 58.5           | 13.8 VPa <sup>-1</sup>   | 45         |
| PVDF-Mg                                               | Ni-Cu polyester fabric        | 1.3            | 10 VPa <sup>-1</sup>     | This work  |

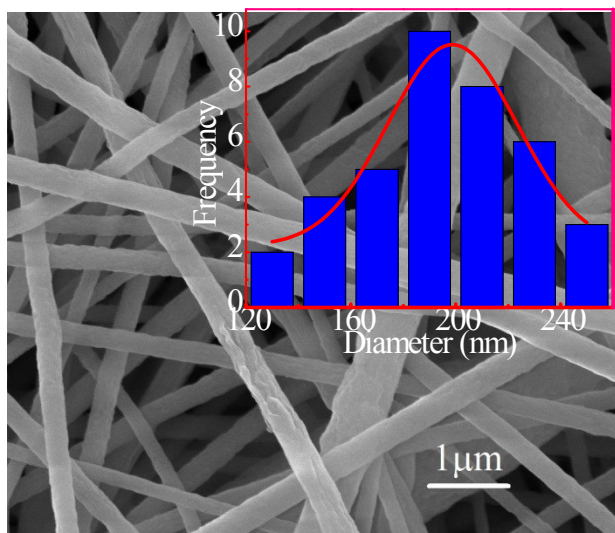

**Figure S1** FE-SEM images of electrospun nanofibers mat of neat PVDF.

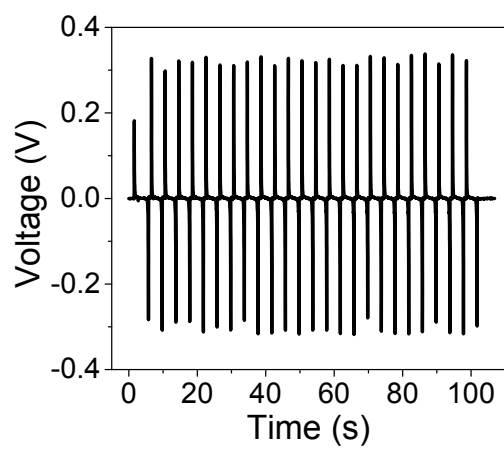

**Figure S2.** The energy harvesting performance of the nanogenerator upon repeated bending and releasing motion of 5 mm/s.

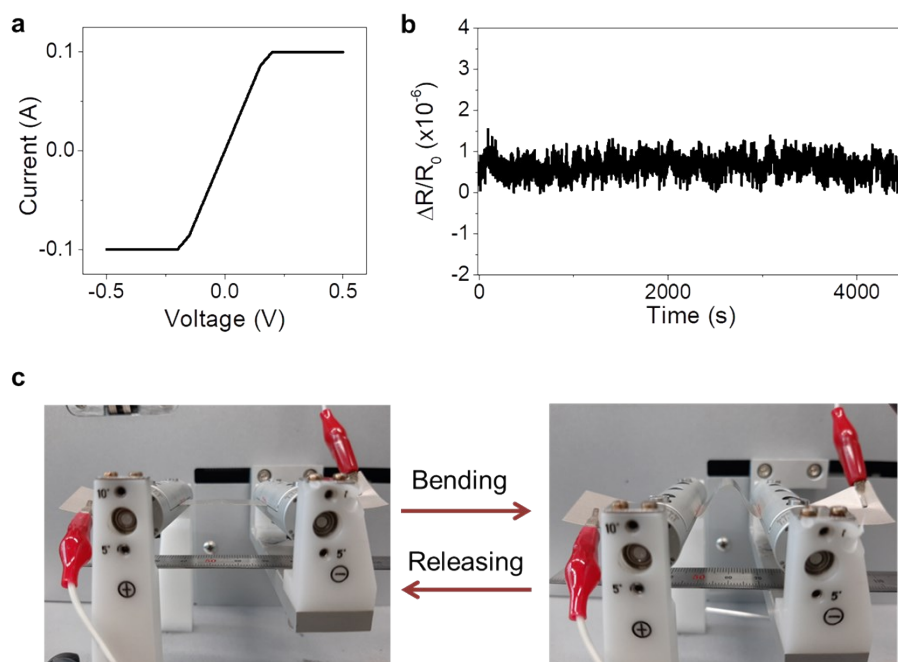

**Figure S3.** (a) The current (I)-voltage (V) graph of the fiber based conducting fabric used in the energy harvesting process. A sheet of conducting fabric (4 cm length, 2 cm width and 0.06 mm thickness) was used for I-V curve measurement. From the slope ( $\sim 0.534$ ) of the I-V curve (linear portion), the estimated conductivity was 17800 S/m. (b) The change of resistance ( $\Delta R/R_0$ , where  $R_0$  was the initial resistance) measurement of the fabric upon repetitive (c) bending and unbending cycles for longer duration with the speed of 1 mm/s.



## References

- 1 X. L. Chen, H. M. Tian, X. M. Li, J. Y. Shao, Y. C. Ding, N. L. An and Y. P. Zhou, *Nanoscale*, 2015, **7**, 11536.
- 2 R. S. Dahiya, D. Cattin, A. Adami, C. Collini, L. Barboni, M. Valle, L. Lorenzelli, R. Oboe, G. Metta and F. Brunetti, *IEEE Sensors J*, 2011, **11**, 3216.
- 3 C. Li, P. –M. Wu, S. Lee, A. Gorton, M. J. Schulz and C. H. Ahn, *J. Microelectromech. Syst.*, 2008, **17**, 334.
- 4 G. Zhao, X. Zhang, X. Cui, S. Wang, Z. Liu, L. Deng, A. Qi, X. Qiao, L. Li, C. Pan, Y. Zhang and L. Li, *ACS Appl. Mater. Interfaces*, 2018, **10**, 15855.
- 5 A. Wang, M. Hu, L. Zhou and X. Qiang, *Nanomaterials*, 2018, **8**, 1021.
- 6 B. Wang, C. Liu, Y. Xiao, J. Zhong, W. Li, Y. Cheng, B. Hu, L. Huang and J. Zhou, *Nano Energy*, 2017, **32**, 42.
- 7 T. Sharma, S. –S. Je, B. Gill and J. X. J. Zhang, *Sens. Actuators A: Physical*, 2012, **177**, 87.
- 8 Y. R. Wang, J. M. Zheng, G. Y. Ren, P. H. Zhang, and C. Xu, *Smart Mater. Struct.*, 2011, **20**, 045009.
- 9 V. Bhavanasi, D. Y. Kusuma and P. S. Lee, *Adv. Energy Mater.* 4(2014), 1400723.
- 10 W. Guo, C. Tan, K. Shi, J. Li, X. –X. Wang, B. Sun, X. Huang, Y. –Z. Long and P. Jiang, *Nanoscale*, 2018, **10**, 17751.

- 11 Q. -L. Zhao, G. -P. He, J. -J. Di, W. -L. Song, Z. -L. Hou, P. -P. Tan, D. -W. Wang, and M. -S. Cao, *ACS Appl. Mater. Interfaces*, 2017, **9**, 24696.
- 12 S. M. Hosseini and A. A. Yousefi, *Org. Electron.*, 2017, **50**, 121.
- 13 T. Yang, H. Pan, G. Tian, B. Zhang, D. Xiong, Y. Gao, C. Yan, X. Chu, N. Chen, S. Zhong, L. Zhang, W. Deng and W. Yang, *Nano Energy*, 2020, **72**, 104706.
- 14 X. Guan, B. Xu and J. Gong, *Nano Energy*, 2020, **70**, 104516.
- 15 K. Maity, S. Garain, K. Henkel, D. Schmeißer and D. Mandal, *ACS Appl. Polym. Mater.*, 2020, **2**, 862.
- 16 M. M. Abolhasani, M. Naebe, K. Shirvanimoghaddam, H. Fashandi, H. Khayyam, M. Joordens, A. Pipertzis, S. Anwar, R. Berger, G. Floudas, J. Michels and K. Asadi, *Nano Energy*, 2019, **62**, 594.
- 17 S. K. Ghosh and D. Mandal, 2018, **53**, 245.
- 18 E. J. Lee, T. Y. Kim, S. -W. Kim, S. Jeong, Y. Choi and S. Y. Lee, *Energy Environ. Sci.*, 2018, **11**, 1425.
- 19 K. Maity, S. Garain, K. Henkel, D. Schmeißer, D. Mandal, *ACS Appl. Mater. Interfaces*, 2018, **10**, 44018.
- 20 K. Shi, B. Sun, X. Huang and P. Jiang, *Nano Energy*, 2018, **52**, 153.
- 21 S. Siddiqui, D. -I. Kim, E. Roh, L. T. Duy, T. Q. Trung, M. T. Nguyen and N. -E. Lee, *Nano Energy*, 2016, **30**, 434.
- 22 A. Sultana, M. M. Alam, A. Biswas, T. R. Middy and D. Mandal, *Transl. Mater. Res.* 3(2016), 045001.
- 23 A. Sultana, M. M. Alam, S. K. Ghosh, T. R. Middy and D. Mandal, *Energy*, 2019, **166**, 963.

- 24 C. Zhang, Y. Fan, H. Li, Y. Li, L. Zhang, S. Cao, S. Kuang, Y. Zhao, A. Chen, G. Zhu and Z. L. Wang, *ACS Nano*, 2018, **12**, 4803.
- 25 L. Zhang, J. Gui, Z. Wu, R. Li, Y. Wang, Z. Gong, X. Zhao, C. Sun and S. Guo, *Nano Energy*, 2019, **65**, 103924.
- 26 C. Brosseau, P. Queffelec, and P. Talbot, *J. Appl. Phys.*, 2001, **89**, 4532.
- 27 A. Sultana, S. K. Ghosh, M. M. Alam, P. Sadhukhan, K. Roy, M. Xie, C. R. Bowen, S. Sarkar, S. Das, T. R. Mridha and D. Mandal, *ACS Appl. Mater. Interfaces*, 2019, **11**, 27279–27287.
- 28 S. K. Ghosh and D. Mandal, *Nano Energy*, 2018, **53**, 245–257.
- 29 Z. C. Pan, L. Lin, J. Huang and Z. Ou, *Smart Mater. Struct.*, 2014, **23**, 025003.
- 30 K. Maity and D. Mandal, *ACS Appl. Mater. Interfaces*, 2018, **10**, 18257–18269.
- 31 K. Roy, S. K. Ghosh, A. Sultana, S. Garain, M. Xie, C. R. Bowen, K. Henkel, D. Schmeißer and D. Mandal, *ACS Appl. Nano Mater.*, 2019, **2**, 2013–2025.
- 32 N. Soin, T. H. Shah, S. C. Anand and J. Geng, *Energy Environ. Sci.*, 2014, **7**, 1670–1679.
- 33 K. Maity, S. Garain, K. Henkel, D. Schmeißer and D. Mandal, *ACS Appl. Mater. Interfaces*, 2018, **10**, 44018–44032.
- 34 B. -S. Lee, B. Park, H. -S. Yang, J. W. Han, C. Choong, J. Bae, K. Lee, W. -R. Yu, U. Jeong, U. -I. Chung, J. -J. Park and O. Kim, *ACS Appl. Mater. Interfaces*, 2014, **6**, 3520–3527.
- 35 M. Sharma, V. Srinivas, G. Madras and S. Bose, *RSC Adv.*, 2016, **6**, 6251.
- 36 X. Hu, X. Yan, L. Gong, F. Wang, Y. Xu, L. Feng, D. Zhang and Y. Jiang, *ACS Appl. Mater. Interfaces*, 2019, **11**, 7379–7386.
- 37 X. Liu, J. Ma, X. Wu, L. Lin and X. Wang, *ACS Nano*, 2017, **11**, 1901–1910.

- 38 A. Gebrekrstos, G. Madras and S. Bose, *ACS Omega*, 2018, **3**, 5317–5326.
- 39 C. Lang, J. Fang, H. Shao, X. Ding and T. Lin, *Nat Commun* , 2016, **7**, 11108.
- 40 M. M. Alam, A. Sultana and D. Mandal, *ACS Appl. Energy Mater.*, 2018, **1**, 3103–3112.
- 41 A. Sultana, M. M. Alam, S. K. Ghosh, T. R. Middy and D. Mandal, *Energy*, 2019, **166**, 963–971.
- 42 S. B. Horowitz, M. Sheplak, L. N. Cattafesta and T. Nishida, *J. of Micromec. and Microengg.*, 2006, **16**, 13–16.
- 43 S. Garain, S. Jana, T. K. Sinha, and D. Mandal, *ACS Appl. Mater. Interfaces*, 2016, **8**, 7, 4532–4540.
- 44 C. Langa, J. Fanga, H. Shaoa, H. Wanga, G. Yana, X. Dingb, and T. Lina, *Nano Energy*, 2017, **35**, 146–153.
- 45 A. Sultana, M. M. Alama, P. Sadhukhan, U. K. Ghorai, S. Das, T. R. Middy, and D. Mandal, *Nano Energy*, 2018, **49**,380–392.
